# Supplementary material for: Can Genetic Pleiotropy Replicate Common Clinical Constellations of Cardiovascular Disease and Risk?
Source: PLoS One. 2012 Sep 28;7(9):e46419. doi: 10.1371/journal.pone.0046419 (PMC3460880; doi:10.1371/journal.pone.0046419)
Supplement: Table S2 — List of included studies. (XLSX) [file pone.0046419.s002.xlsx]

## Sheet: studies
PUBMEDID	First Author	Date	Journal	Link	Study title	Discovery Sample Size	Ethnicity	Disease/Trait
CAD
17478679	Helgadottir A	2007-05-03	Science	http://www.ncbi.nlm.nih.gov/pubmed/17478679	A common variant on chromosome 9p21 affects the risk of myocardial infarction.	1,607 cases,6,728 controls	European-Caucasian	Myocardial infarction
17554300	WTCCC	2007-06-07	Nature	http://www.ncbi.nlm.nih.gov/pubmed/17554300	Genome-wide association study of 14,000 cases of seven common diseases and 3,000 shared controls.	1,926 cases,2,938 controls	European-Caucasian	Coronary heart disease
17634449	Samani NJ	2007-07-18	N Engl J Med	http://www.ncbi.nlm.nih.gov/pubmed/17634449	Genomewide association analysis of coronary artery disease.	1,926 cases,2,938 controls	European-Caucasian	Coronary heart disease
17903303	O'Donnell CJ	2007-09-19	BMC Med Genet	http://www.ncbi.nlm.nih.gov/pubmed/17903303	Genome-wide association study for subclinical atherosclerosis in major arterial territories in the NHLBI's Framingham Heart Study.	673-984 individuals, depending on measure(Framingham)	European-Caucasian	Coronary artery calcification
17903304	Larson MG	2007-09-19	BMC Med Genet	http://www.ncbi.nlm.nih.gov/pubmed/17903304	Framingham Heart Study 100K project: genome-wide associations for cardiovascular disease outcomes.	1,341-1,345 individuals, depending on measure(Framingham)	European-Caucasian	Major CVD
19198609	Kathiresan S	2009-02-08	Nat Genet	http://www.ncbi.nlm.nih.gov/pubmed/19198609	Genome-wide association of early-onset myocardial infarction with single nucleotide polymorphisms and copy number variants.	2,967 cases, 3,075 controls	European-Caucasian	Myocardial infarction (early onset)
19198611	Tregouet DA	2009-02-08	Nat Genet	http://www.ncbi.nlm.nih.gov/pubmed/19198611	Genome-wide haplotype association study identifies the SLC22A3-LPAL2-LPA gene cluster as a risk locus for coronary artery disease.	1,926 cases, 2,938 controls	European-Caucasian	Coronary heart disease
19198612	Erdmann J	2009-02-08	Nat Genet	http://www.ncbi.nlm.nih.gov/pubmed/19198612	New susceptibility locus for coronary artery disease on chromosome 3q22.3.	6,990 cases, 8,955 controls	European-Caucasian	Coronary heart disease
21088011	Erdmann J	2010-11-18	Eur Heart J	http://www.ncbi.nlm.nih.gov/pubmed/21088011	Genome-wide association study identifies a new locus for coronary artery disease on chromosome 10p11.23.	1,157 European cases, 1,748 European controls	European-Caucasian	Coronary heart disease
21107343	Aoki A	2010-11-25	J Hum Genet	http://www.ncbi.nlm.nih.gov/pubmed/21107343	SNPs on chromosome 5p15.3 associated with myocardial infarction in Japanese population.	194 Japanese cases, 1,539 Japanese controls	Asian-Japanese	Myocardial infarction
21239051	Reilly MP	2011-01-14	Lancet	http://www.ncbi.nlm.nih.gov/pubmed/21239051	Identification of ADAMTS7 as a novel locus for coronary atherosclerosis and association of ABO with myocardial infarction in the presence of coronary atherosclerosis: two genome-wide association studies.	1,808 European ancestry AngCAD cases, 915 European ancestry AngCAD controls, 4,572 European ancestry AngCAD with MI cases, 2,739 European ancestry AngCAD without MI controls	European-Caucasian	Cardiovascular disease risk factors
21347282	Lettre G	2011-02-10	PLoS Genet	http://www.ncbi.nlm.nih.gov/pubmed/21347282	Genome-wide association study of coronary heart disease and its risk factors in 8,090 African Americans: the NHLBI CARe Project.	8,090 African American individuals	African-American	Coronary heart disease
21378988	The Coronary Artery Disease (C4D) Genetics Consortium	2011-03-06	Nat Genet	http://www.ncbi.nlm.nih.gov/pubmed/21378988	A genome-wide association study in Europeans and South Asians identifies five new loci for coronary artery disease.	8,424 European ancestry cases, 7,268 European ancestry controls, 6,996 South Asian cases, 7,794 South Asian controls	European-Caucasian, Asian-South	Coronary heart disease
21378990	Schunkert H	2011-03-06	Nat Genet	http://www.ncbi.nlm.nih.gov/pubmed/21378990	Large-scale association analysis identifies 13 new susceptibility loci for coronary artery disease.	22,233 European ancestry cases, 64,762 European ancestry controls	European-Caucasian	Coronary heart disease
21606135	Wild PS	2011-05-23	Circ Cardiovasc Genet	http://www.ncbi.nlm.nih.gov/pubmed/21606135	A Genome-wide Association Study Identifies LIPA as a Susceptibility Gene for Coronary Artery Disease.	2,078 European descent cases, 2,953 European descent controls	European-Caucasian	Coronary heart disease
CKD
17395743	Hanson RL	2007-04-01	Diabetes	http://www.ncbi.nlm.nih.gov/pubmed/17395743	Identification of PVT1 as a candidate gene for end-stage renal disease in type 2 diabetes using a pooling-based genome-wide single nucleotide polymorphism association study.	105 cases,102 controls	Native American	End-stage renal disease
17653210	Maeda S	2007-08-01	Kidney Int Suppl	http://www.ncbi.nlm.nih.gov/pubmed/17653210	Genetic variations associated with diabetic nephropathy and type II diabetes in a Japanese population.	94 cases,94 controls	Asian-Japanese	End-stage renal disease
17903292	Hwang SJ	2007-09-19	BMC Med Genet	http://www.ncbi.nlm.nih.gov/pubmed/17903292	A genome-wide association for kidney function and endocrine-related traits in the NHLBI's Framingham Heart Study.	810-1,010 individualsdepending on measure(Framingham	European-Caucasian	Creatinine Clearance
19430482	Kottgen A	2009-05-10	Nat Genet	http://www.ncbi.nlm.nih.gov/pubmed/19430482	Multiple loci associated with indices of renal function and chronic kidney disease.	19,877 individuals, up to 2,388 cases	European-Caucasian	Chronic kidney disease
20383145	Chambers JC	2010-04-11	Nat Genet	http://www.ncbi.nlm.nih.gov/pubmed/20383145	Genetic loci influencing kidney function and chronic kidney disease.	23,812 European descent individuals	European-Caucasian	Creatinine Clearance
20383146	Kottgen A	2010-04-11	Nat Genet	http://www.ncbi.nlm.nih.gov/pubmed/20383146	New loci associated with kidney function and chronic kidney disease.	Up to 67,093 European ancestry individuals	European-Caucasian	Chronic kidney disease
20532800	Bostrom MA	2010-06-08	Hum Genet	http://www.ncbi.nlm.nih.gov/pubmed/20532800	Candidate genes for non-diabetic ESRD in African Americans: a genome-wide association study using pooled DNA.	464 African American cases, 478 African American controls	African-American	End-stage renal disease
20686651	Gudbjartsson DF	2010-07-29	PLoS Genet	http://www.ncbi.nlm.nih.gov/pubmed/20686651	Association of variants at UMOD with chronic kidney disease and kidney stones-role of age and comorbid diseases.	2,903 Icelandic CKD cases, 35,818 Icelandic controls, 22,256 Icelandic subjects with serum creatinine	European-Caucasian	Chronic kidney disease
21150874	McDonough CW	2010-12-08	Kidney Int	http://www.ncbi.nlm.nih.gov/pubmed/21150874	A genome-wide association study for diabetic nephropathy genes in African Americans.	965 African American cases, 1,029 African American controls	African American	End-stage renal disease
21355061	Boger CA	2011-02-25	J Am Soc Nephrol	http://www.ncbi.nlm.nih.gov/pubmed/21355061	CUBN is a gene locus for albuminuria.	31,580 European ancestry individuals	European-Caucasian	Creatinine Clearance
21546767	Murea M	2011-05-05	Am J Nephrol	http://www.ncbi.nlm.nih.gov/pubmed/21546767	Genome-Wide Association Scan for Survival on Dialysis in African-Americans with Type 2 Diabetes.	610 African American type 2 diabetics	African-American	End-stage renal disease
Hyperlipidemia
17463246	Saxena R	2007-04-26	Science	http://www.ncbi.nlm.nih.gov/pubmed/17463246	Genome-wide association analysis identifies loci for type 2 diabetes and triglyceride levels.	up to 5,217 individuals	European-Caucasian	LDL,HDL,Triglycerides
18179892	Wallace C	2008-01-10	Am J Hum Genet	http://www.ncbi.nlm.nih.gov/pubmed/18179892	Genome-wide association study identifies genes for biomarkers of cardiovascular disease: serum urate and dyslipidemia.	1,955 hypertensive individuals	European-Caucasian	LDL
18193043	Willer CJ	2008-01-13	Nat Genet	http://www.ncbi.nlm.nih.gov/pubmed/18193043	Newly identified loci that influence lipid concentrations and risk of coronary artery disease.	8,589 individuals,8,656 individuals,8,684 individuals	European-Caucasian	LDL,HDL,Triglycerides
18193044	Kathiresan S	2008-01-13	Nat Genet	http://www.ncbi.nlm.nih.gov/pubmed/18193044	Six new loci associated with blood low-density lipoprotein cholesterol, high-density lipoprotein cholesterol or triglycerides in humans.	2,758 individuals	European-Caucasian	LDL,HDL,Triglycerides
18193046	Kooner JS	2008-01-13	Nat Genet	http://www.ncbi.nlm.nih.gov/pubmed/18193046	Genome-wide scan identifies variation in MLXIPL associated with plasma triglycerides.	2,011 individuals	Asian-Indian,European-Caucasian	Triglycerides
18262040	Sandhu MS	2008-02-09	Lancet	http://www.ncbi.nlm.nih.gov/pubmed/18262040	LDL-cholesterol concentrations: a genome-wide association study.	11,685 individuals	European-Caucasian	LDL
18454146	Chambers JC	2008-05-04	Nat Genet	http://www.ncbi.nlm.nih.gov/pubmed/18454146	Common genetic variation near MC4R is associated with waist circumference and insulin resistance.	2,684 Asian Indian men	Asian-Indian	HDL, Triglycerides
18802019	Burkhardt R	2008-09-18	Arterioscler Thromb Vasc Biol	http://www.ncbi.nlm.nih.gov/pubmed/18802019	Common SNPs in HMGCR in micronesians and whites associated with LDL-cholesterol levels affect alternative splicing of exon13.	2,346 Micronesian individuals	Asian-Micronesian	LDL
19060906	Kathiresan S	2008-12-07	Nat Genet	http://www.ncbi.nlm.nih.gov/pubmed/19060906	Common variants at 30 loci contribute to polygenic dyslipidemia.	19,840 individuals	European-Caucasian	LDL,HDL,Triglycerides
19060910	Sabatti C	2008-12-07	Nat Genet	http://www.ncbi.nlm.nih.gov/pubmed/19060910	Genome-wide association analysis of metabolic traits in a birth cohort from a founder population.	4,763 individuals	European-Caucasian	LDL,HDL,Triglycerides
19060911	Aulchenko YS	2008-12-07	Nat Genet	http://www.ncbi.nlm.nih.gov/pubmed/19060911	Loci influencing lipid levels and coronary heart disease risk in 16 European population cohorts.	17,797 individuals,21,412 individuals,22,562 individuals,17,815 individuals	European-Caucasian	LDL,HDL,Total cholesterol,Triglycerides
19074352	Pollin TI	2008-12-17	Science	http://www.ncbi.nlm.nih.gov/pubmed/19074352	A null mutation in human APOC3 confers a favorable plasma lipid profile and apparent cardioprotection.	809 individuals	European-Caucasian (Amish)	Triglycerides
19197348	Lowe JK	2009-02-06	PLoS Genet	http://www.ncbi.nlm.nih.gov/pubmed/19197348	Genome-wide association studies in an isolated founder population from the Pacific Island of Kosrae.	Up to 2,906 Micronesian individuals	Asian-Micronesian	LDL,HDL,Triglycerides
19260141	Zemunik T	2009-02-01	Croat Med J	http://www.ncbi.nlm.nih.gov/pubmed/19260141	Genome-wide association study of biochemical traits in Korcula Island, Croatia.	898 individuals	European-Caucasian	LDL,HDL,Total cholesterol,Triglycerides
19359809	Hiura Y	2009-04-10	Circ J	http://www.ncbi.nlm.nih.gov/pubmed/19359809	Identification of genetic markers associated with high-density lipoprotein-cholesterol by genome-wide screening in a Japanese population: the Suita study.	900 Japanese individuals	Asian-Japanese	LDL
20031538	Heid IM	2008-10-01	Circ Cardiovasc Genet	http://www.ncbi.nlm.nih.gov/pubmed/20031538	Genome-wide association analysis of high-density lipoprotein cholesterol in the population-based KORA study sheds new light on intergenic regions.	Up to 4,274 European individuals	European-Caucasian	HDL
20031564	Ridker PM	2009-02-01	Circ Cardiovasc Genet	http://www.ncbi.nlm.nih.gov/pubmed/20031564	Polymorphism in the CETP gene region, HDL cholesterol, and risk of future myocardial infarction: Genomewide analysis among 18 245 initially healthy women from the Women's Genome Health Study.	18,425 European ancestry females	European-Caucasian	HDL
20066028	Igl W	2010-01-08	PLoS Genet	http://www.ncbi.nlm.nih.gov/pubmed/20066028	Modeling of environmental effects in genome-wide association studies identifies SLC2A2 and HP as novel loci influencing serum cholesterol levels.	656 Swedish individuals	European-Caucasian	Total cholesterol
20657596	Johansen CT	2010-07-25	Nat Genet	http://www.ncbi.nlm.nih.gov/pubmed/20657596	Excess of rare variants in genes identified by genome-wide association study of hypertriglyceridemia.	463 European ancestry cases, 1,197 European ancestry controls	European-Caucasian	Triglycerides
20686565	Teslovich TM	2010-08-05	Nature	http://www.ncbi.nlm.nih.gov/pubmed/20686565	Biological, clinical and population relevance of 95 loci for blood lipids.	Up to 100,184 European descent individuals	European-Caucasian	LDL,HDL
20838585	Smith EN	2010-09-09	PLoS Genet	http://www.ncbi.nlm.nih.gov/pubmed/20838585	Longitudinal genome-wide association of cardiovascular disease risk factors in the Bogalusa heart study.	525 European ancestry individuals	European-Caucasian	LDL,HDL,Triglycerides
20864672	Waterworth DM	2010-09-23	Arterioscler Thromb Vasc Biol	http://www.ncbi.nlm.nih.gov/pubmed/20864672	Genetic variants influencing circulating lipid levels and risk of coronary artery disease.	up to 17,243 white European descent individuals	European-Caucasian	LDL,HDL,Triglycerides
21059979	Shen H	2010-11-08	Arch Intern Med	http://www.ncbi.nlm.nih.gov/pubmed/21059979	Familial defective apolipoprotein B-100 and increased low-density lipoprotein cholesterol and coronary artery calcification in the old order amish.	841 Old Order Amish individuals	European-Caucasian (Amish)	LDL, Total cholesterol
21347282	Lettre G	2011-02-10	PLoS Genet	http://www.ncbi.nlm.nih.gov/pubmed/21347282	Genome-wide association study of coronary heart disease and its risk factors in 8,090 African Americans: the NHLBI CARe Project.	8,090 African American individuals	African-American	LDL,HDL
Hypertension
17554300	WTCCC	2007-06-07	Nature	http://www.ncbi.nlm.nih.gov/pubmed/17554300	Genome-wide association study of 14,000 cases of seven common diseases and 3,000 shared controls.	1,952 cases,2,938 controls	European-Caucasian	General blood pressure
17903302	Levy D	2007-09-19	BMC Med Genet	http://www.ncbi.nlm.nih.gov/pubmed/17903302	Framingham Heart Study 100K Project: genome-wide associations for blood pressure and arterial stiffness.	644-1,327 individuals, depending on measure(Framingham)	European-Caucasian	General blood pressure, Diastolic blood pressure, Systolic blood pressure,
19114657	Wang Y	2008-12-29	Proc Natl Acad Sci U S A	http://www.ncbi.nlm.nih.gov/pubmed/19114657	From the Cover: Whole-genome association study identifies STK39 as a hypertension susceptibility gene.	542 individuals	European-Caucasian (Amish)	Systolic blood pressure
19197348	Lowe JK	2009-02-06	PLoS Genet	http://www.ncbi.nlm.nih.gov/pubmed/19197348	Genome-wide association studies in an isolated founder population from the Pacific Island of Kosrae.	Up to 2,906 Micronesian individuals	Asian-Micronesian	Diastolic blood pressure, Systolic blood pressure
19304780	Org E	2009-03-20	Hum Mol Genet	http://www.ncbi.nlm.nih.gov/pubmed/19304780	Genome-wide scan identifies CDH13 as a novel susceptibility locus contributing to blood pressure determination in two European populations.	364 cases, 590 controls	European-Caucasian	General blood pressure
19396169	Cho YS	2009-04-26	Nat Genet	http://www.ncbi.nlm.nih.gov/pubmed/19396169	A large-scale genome-wide association study of Asian populations uncovers genetic factors influencing eight quantitative traits.	8,842 Korean individuals	Asian-Korean	Diastolic blood pressure, Systolic blood pressure
19421330	Yang HC	2009-05-07	PLoS One	http://www.ncbi.nlm.nih.gov/pubmed/19421330	Genome-wide association study of young-onset hypertension in the Han Chinese population of Taiwan.	175 Han Chinese cases, 175 Han Chinese controls	Asian-Chinese	General blood pressure
19430479	Levy D	2009-05-10	Nat Genet	http://www.ncbi.nlm.nih.gov/pubmed/19430479	Genome-wide association study of blood pressure and hypertension.	29,136 individuals	European-Caucasian	General blood pressure, Diastolic blood pressure, Systolic blood pressure,
19430483	Newton-Cheh C	2009-05-10	Nat Genet	http://www.ncbi.nlm.nih.gov/pubmed/19430483	Genome-wide association study identifies eight loci associated with blood pressure.	34,433 individuals	European-Caucasian	Diastolic blood pressure, Systolic blood pressure
19609347	Adeyemo A	2009-07-17	PLoS Genet	http://www.ncbi.nlm.nih.gov/pubmed/19609347	A genome-wide association study of hypertension and blood pressure in African Americans.	509 African American cases, 508 African American controls	African-American	General blood pressure
21082022	Padmanabhan S	2010-10-28	PLoS Genet	http://www.ncbi.nlm.nih.gov/pubmed/21082022	Genome-wide association study of blood pressure extremes identifies variant near UMOD associated with hypertension.	1,621 Swedish cases, 1,699 Swedish controls	European-Caucasian	General blood pressure
21347282	Lettre G	2011-02-10	PLoS Genet	http://www.ncbi.nlm.nih.gov/pubmed/21347282	Genome-wide association study of coronary heart disease and its risk factors in 8,090 African Americans: the NHLBI CARe Project.	8,090 African American individuals	African-American	General blood pressure
Obesity
17434869	Frayling TM	2007-04-12	Science	http://www.ncbi.nlm.nih.gov/pubmed/17434869	A common variant in the FTO gene is associated with body mass index and predisposes to childhood and adult obesity.	10,657 adults	European-Caucasian	Body mass index
17658951	Scuteri A	2007-07-20	PLoS Genet	http://www.ncbi.nlm.nih.gov/pubmed/17658951	Genome-wide association scan shows genetic variants in the FTO gene are associated with obesity-related traits.	4,741 individuals	European-Caucasian	Body mass index, Weight, Waist-hip ratio
17903300	Fox CS	2007-09-19	BMC Med Genet	http://www.ncbi.nlm.nih.gov/pubmed/17903300	Genome-wide association to body mass index and waist circumference: the Framingham Heart Study 100K project.	1,341 individuals(Framingham)	European-Caucasian	Body mass index, Waist circumference
18159244	Hinney A	2007-12-26	PLoS One	http://www.ncbi.nlm.nih.gov/pubmed/18159244	Genome wide association (GWA) study for early onset extreme obesity supports the role of fat mass and obesity associated gene (FTO) variants.	487 young cases,442 controls	European-Caucasian	Obesity
18454146	Chambers JC	2008-05-04	Nat Genet	http://www.ncbi.nlm.nih.gov/pubmed/18454146	Common genetic variation near MC4R is associated with waist circumference and insulin resistance.	2,684 Asian Indian men	Asian-Indian	Waist circumference
18454148	Loos RJ	2008-05-04	Nat Genet	http://www.ncbi.nlm.nih.gov/pubmed/18454148	Adiposity-related heterogeneity in patterns of type 2 diabetes susceptibility observed in genome-wide association data.	1,924 cases, 2,938 controls	European-Caucasian	Obesity
19079260	Thorleifsson G	2008-12-14	Nat Genet	http://www.ncbi.nlm.nih.gov/pubmed/19079260	Genome-wide association yields new sequence variants at seven loci that associate with measures of obesity.	80,969 individuals	European-Caucasian	Body mass index, Weight
19079261	Willer CJ	2008-12-14	Nat Genet	http://www.ncbi.nlm.nih.gov/pubmed/19079261	Six new loci associated with body mass index highlight a neuronal influence on body weight regulation.	32,387 individuals	European-Caucasian	Body mass index
19151714	Meyre D	2009-01-18	Nat Genet	http://www.ncbi.nlm.nih.gov/pubmed/19151714	Genome-wide association study for early-onset and morbid adult obesity identifies three new risk loci in European populations.	695 obese adults, 685 obese children, 731 lean adults, 685 lean children	European-Caucasian	Obesity
19197348	Lowe JK	2009-02-06	PLoS Genet	http://www.ncbi.nlm.nih.gov/pubmed/19197348	Genome-wide association studies in an isolated founder population from the Pacific Island of Kosrae.	Up to 2,906 Micronesian individuals	Asian-Micronesian	Body mass index, Weight, Waist circumference, % body fat
19260139	Polasek O	2009-02-01	Croat Med J	http://www.ncbi.nlm.nih.gov/pubmed/19260139	Genome-wide association study of anthropometric traits in Korcula Island, Croatia.	898 individuals	European-Caucasian	Body mass index, Weight, Waist circumference
19396169	Cho YS	2009-04-26	Nat Genet	http://www.ncbi.nlm.nih.gov/pubmed/19396169	A large-scale genome-wide association study of Asian populations uncovers genetic factors influencing eight quantitative traits.	8,842 Korean individuals	Asian-Korean	Body mass index, Waist-hip ratio
19553259	Cotsapas C	2009-06-24	Hum Mol Genet	http://www.ncbi.nlm.nih.gov/pubmed/19553259	Common body mass index-associated variants confer risk of extreme obesity.	775 Caucasian cases, 3,197 Caucasian controls	European-Caucasian	Obesity
19557161	Lindgren CM	2009-06-26	PLoS Genet	http://www.ncbi.nlm.nih.gov/pubmed/19557161	Genome-wide association scan meta-analysis identifies three Loci influencing adiposity and fat distribution.	38,580 European-ancestry individuals	European-Caucasian	Waist circumference, Waist-hip ratio
19557197	Heard-Costa NL	2009-06-26	PLoS Genet	http://www.ncbi.nlm.nih.gov/pubmed/19557197	NRXN3 is a novel locus for waist circumference: a genome-wide association study from the CHARGE Consortium.	31,373 Caucasian individuals	European-Caucasian	Waist circumference
19851299	Johansson A	2009-10-22	Obesity (Silver Spring)	http://www.ncbi.nlm.nih.gov/pubmed/19851299	Linkage and genome-wide association analysis of obesity-related phenotypes: association of weight with the MGAT1 gene.	Up to 3,925 European individuals	European-Caucasian	Body mass index, Weight
20397748	Liu JZ	2010-04-01	Twin Res Hum Genet	http://www.ncbi.nlm.nih.gov/pubmed/20397748	Genome-wide association study of height and body mass index in Australian twin families.	11,536 European descent family members	European-Caucasian	Body mass index
20421936	Scherag A	2010-04-22	PLoS Genet	http://www.ncbi.nlm.nih.gov/pubmed/20421936	Two new Loci for body-weight regulation identified in a joint analysis of genome-wide association studies for early-onset extreme obesity in French and german study groups.	1,138 French and German extremely obese children, 1,120 French and German normal or underweight children	European-Caucasian	Obesity
20838585	Smith EN	2010-09-09	PLoS Genet	http://www.ncbi.nlm.nih.gov/pubmed/20838585	Longitudinal genome-wide association of cardiovascular disease risk factors in the Bogalusa heart study.	525 European ancestry individuals	European-Caucasian	Waist circumference
20935629	Heid IM	2010-10-10	Nat Genet	http://www.ncbi.nlm.nih.gov/pubmed/20935629	Meta-analysis identifies 13 new loci associated with waist-hip ratio and reveals sexual dimorphism in the genetic basis of fat distribution.	Up to 77,167 European descent individuals	European-Caucasian	Waist-hip ratio
20935630	Speliotes EK	2010-10-10	Nat Genet	http://www.ncbi.nlm.nih.gov/pubmed/20935630	Association analyses of 249,796 individuals reveal 18 new loci associated with body mass index.	Up to 123,865 European ancestry individuals	European-Caucasian	Body mass index
20966902	Croteau-Chonka DC	2010-10-21	Obesity (Silver Spring)	http://www.ncbi.nlm.nih.gov/pubmed/20966902	Genome-wide association study of anthropometric traits and evidence of interactions with age and study year in Filipino women.	1,792 Filipino women	Asian-Filipino	Body mass index, Weight, Waist circumference
21544081	Dorajoo R	2011-04-19	Int J Obes (Lond)	http://www.ncbi.nlm.nih.gov/pubmed/21544081	Replication of 13 obesity loci among Singaporean Chinese, Malay and Asian-Indian populations.	5,429 Chinese individuals, 2,431 Malay individuals, 2,531 Asian Indian individuals	Asian-Chinese,Malaysian,Indian	Obesity
21552555	Wang K	2011-04-28	PLoS One	http://www.ncbi.nlm.nih.gov/pubmed/21552555	A genome-wide association study on obesity and obesity-related traits.	520 non-Hispanic Caucasian cases, 540 non-Hispanic Caucasian controls	European-Caucasian	Obesity, Body mass index, Weight, Waist circumference, Waist-hip ratio
Type 2 Diabetes
17293876	Sladek R	2007-02-11	Nature	http://www.ncbi.nlm.nih.gov/pubmed/17293876	A genome-wide association study identifies novel risk loci for type 2 diabetes.	661 cases,614 controls	European-Caucasian	Type 2 Diabetes
17460697	Steinthorsdottir V	2007-04-26	Nat Genet	http://www.ncbi.nlm.nih.gov/pubmed/17460697	A variant in CDKAL1 influences insulin response and risk of type 2 diabetes.	1,399 EA cases,5,275 EA controls	European-Caucasian	Type 2 Diabetes
17463246	Saxena R	2007-04-26	Science	http://www.ncbi.nlm.nih.gov/pubmed/17463246	Genome-wide association analysis identifies loci for type 2 diabetes and triglyceride levels.	1,464 cases,1,467 controls	European-Caucasian	Type 2 Diabetes
17463248	Scott LJ	2007-04-26	Science	http://www.ncbi.nlm.nih.gov/pubmed/17463248	A genome-wide association study of type 2 diabetes in Finns detects multiple susceptibility variants.	1,161 cases,1,174 controls	European-Caucasian	Type 2 Diabetes
17463249	Zeggini E	2007-04-26	Science	http://www.ncbi.nlm.nih.gov/pubmed/17463249	Replication of genome-wide association signals in UK samples reveals risk loci for type 2 diabetes.	1,924 cases,2,938 controls	European-Caucasian	Type 2 Diabetes
17554300	WTCCC	2007-06-07	Nature	http://www.ncbi.nlm.nih.gov/pubmed/17554300	Genetic variations associated with diabetic nephropathy and type II diabetes in a Japanese population.	94 cases,94 controls	Asian-Japanese	Type 2 Diabetes
17668382	Salonen JT	2007-06-26	Am J Hum Genet	http://www.ncbi.nlm.nih.gov/pubmed/17668382	Type 2 diabetes whole-genome association study in four populations: the DiaGen consortium.	500 cases,497 controls	European-Caucasian	Type 2 Diabetes
17903298	Meigs JB	2007-09-19	BMC Med Genet	http://www.ncbi.nlm.nih.gov/pubmed/17903298	Genome-wide association with diabetes-related traits in the Framingham Heart Study.	1,087 individuals(Framingham)	European-Caucasian	Type 2 Diabetes,HBA1C,Insulin response, Fasting glucose
18372903	Zeggini E	2008-03-30	Nat Genet	http://www.ncbi.nlm.nih.gov/pubmed/18372903	Meta-analysis of genome-wide association data and large-scale replication identifies additional susceptibility loci for type 2 diabetes.	4,549 cases,5,579 controls	European-Caucasian	Type 2 Diabetes
18451265	Bouatia-Naji N	2008-06-19	Science	http://www.ncbi.nlm.nih.gov/pubmed/18451265	A polymorphism within the G6PC2 gene is associated with fasting plasma glucose levels.	654 normoglycemic individuals	European-Caucasian	Impaired fasting glucose
18521185	Chen WM	2008-06-04	J Clin Invest	http://www.ncbi.nlm.nih.gov/pubmed/18521185	Variations in the G6PC2/ABCB11 genomic region are associated with fasting glucose levels.	5,088 nondiabetic individuals	European-Caucasian	Impaired fasting glucose
18711366	Unoki H	2008-08-17	Nat Genet	http://www.ncbi.nlm.nih.gov/pubmed/18711366	SNPs in KCNQ1 are associated with susceptibility to type 2 diabetes in East Asian and European populations.	194 Japanese cases, 1,558 Japanese controls	Asian-Japanese	Type 2 Diabetes
18711367	Yasuda K	2008-08-17	Nat Genet	http://www.ncbi.nlm.nih.gov/pubmed/18711367	Variants in KCNQ1 are associated with susceptibility to type 2 diabetes mellitus.	187 Japanese cases, 1,504 Japanese controls	Asian-Japanese	Type 2 Diabetes
19056611	Timpson NJ	2008-12-03	Diabetes	http://www.ncbi.nlm.nih.gov/pubmed/19056611	Adiposity-related heterogeneity in patterns of type 2 diabetes susceptibility observed in genome-wide association data.	1,924 cases, 2,938 controls	European-Caucasian	Type 2 Diabetes
19060907	Prokopenko I	2008-12-01	Nat Genet	http://www.ncbi.nlm.nih.gov/pubmed/19060907	Variants in MTNR1B influence fasting glucose levels.	35,812 individuals	European-Caucasian	Impaired fasting glucose
19060909	Bouatia-Naji N	2008-12-07	Nat Genet	http://www.ncbi.nlm.nih.gov/pubmed/19060909	A variant near MTNR1B is associated with increased fasting plasma glucose levels and type 2 diabetes risk.	2,151 individuals	European-Caucasian	Impaired fasting glucose
19060910	Sabatti C	2008-12-07	Nat Genet	http://www.ncbi.nlm.nih.gov/pubmed/19060910	Genome-wide association analysis of metabolic traits in a birth cohort from a founder population.	4,763 individuals	European-Caucasian	Impaired fasting glucose
19096518	Pare G	2008-12-19	PLoS Genet	http://www.ncbi.nlm.nih.gov/pubmed/19096518	Novel association of HK1 with glycated hemoglobin in a non-diabetic population: a genome-wide evaluation of 14,618 participants in the Women's Genome Health Study.	14,618 Caucasian women	European-Caucasian	HBA1C
19401414	Takeuchi F	2009-04-29	Diabetes	http://www.ncbi.nlm.nih.gov/pubmed/19401414	Confirmation of multiple risk Loci and genetic impacts by a genome-wide association study of type 2 diabetes in the Japanese population.	519 Japanese cases, 503 Japanese controls	Asian-Japanese	Type 2 Diabetes
19651812	Chambers JC	2009-08-03	Diabetes	http://www.ncbi.nlm.nih.gov/pubmed/19651812	Common genetic variation near melatonin receptor MTNR1B contributes to raised plasma glucose and increased risk of type 2 diabetes among Indian Asians and European Caucasians.	7,474 Indian Asian individuals	Asian-Indian	Impaired fasting glucose
19734900	Rung J	2009-09-06	Nat Genet	http://www.ncbi.nlm.nih.gov/pubmed/19734900	Genetic variant near IRS1 is associated with type 2 diabetes, insulin resistance and hyperinsulinemia.	679 French cases, 697 French controls	European-Caucasian	Type 2 Diabetes
20081857	Saxena R	2010-01-17	Nat Genet	http://www.ncbi.nlm.nih.gov/pubmed/20081857	Genetic variation in GIPR influences the glucose and insulin responses to an oral glucose challenge.	15,234 European individuals	European-Caucasian	Impaired fasting glucose
20081858	Dupuis J	2010-01-17	Nat Genet	http://www.ncbi.nlm.nih.gov/pubmed/20081858	New genetic loci implicated in fasting glucose homeostasis and their impact on type 2 diabetes risk.	up to 46,186 European descent individuals	European-Caucasian	Impaired fasting glucose, Reduced insulin response
20174558	Tsai FJ	2010-02-19	PLoS Genet	http://www.ncbi.nlm.nih.gov/pubmed/20174558	A genome-wide association study identifies susceptibility variants for type 2 diabetes in Han Chinese.	995 Han Chinese cases, 894 Han Chinese controls	Asian-Chinese	Type 2 Diabetes
20418489	Qi L	2010-04-23	Hum Mol Genet	http://www.ncbi.nlm.nih.gov/pubmed/20418489	Genetic variants at 2q24 are associated with susceptibility to type 2 diabetes.	2,591 European ancestry cases, 3,052 European ancestry controls	European-Caucasian	Type 2 Diabetes
20581827	Voight BF	2010-06-27	Nat Genet	http://www.ncbi.nlm.nih.gov/pubmed/20581827	Twelve type 2 diabetes susceptibility loci identified through large-scale association analysis.	8,130 European descent cases, 38,987 European descent controls	European-Caucasian	Type 2 Diabetes
20818381	Yamauchi T	2010-09-05	Nat Genet	http://www.ncbi.nlm.nih.gov/pubmed/20818381	A genome-wide association study in the Japanese population identifies susceptibility loci for type 2 diabetes at UBE2E2 and C2CD4A-C2CD4B.	4,470 Japanese cases, 3,071 Japanese controls	Asian-Japanese	Type 2 Diabetes
20849430	Franklin CS	2010-09-16	Ann Hum Genet	http://www.ncbi.nlm.nih.gov/pubmed/20849430	The TCF7L2 diabetes risk variant is associated with HbA1(C) levels: a genome-wide association meta-analysis.	1,782 non-diabetic Scottish and Croatian individuals	European-Caucasian	HBA1C
20858683	Soranzo N	2010-09-21	Diabetes	http://www.ncbi.nlm.nih.gov/pubmed/20858683	Common variants at 10 genomic loci influence hemoglobin A1(C) levels via glycemic and nonglycemic pathways.	up to 46,368 European ancestry individuals	European-Caucasian	HBA1C
20862305	Shu XO	2010-09-16	PLoS Genet	http://www.ncbi.nlm.nih.gov/pubmed/20862305	Identification of new genetic risk variants for type 2 diabetes.	1,019 Chinese female cases, 1,710 Chinese female controls	Asian-Chinese	Type 2 Diabetes
21347282	Lettre G	2011-02-10	PLoS Genet	http://www.ncbi.nlm.nih.gov/pubmed/21347282	Genome-wide association study of coronary heart disease and its risk factors in 8,090 African Americans: the NHLBI CARe Project.	8,090 African American individuals	African-American	Type 2 Diabetes
21490949	Sim X	2011-04-07	PLoS Genet	http://www.ncbi.nlm.nih.gov/pubmed/21490949	Transferability of type 2 diabetes implicated loci in multi-ethnic cohorts from Southeast Asia.	2,010 Chinese cases, 1,945 controls, 794 Malaysian cases, 1,240 Malyasian controls, 977 Asian Indian cases, 1,169 Asian Indian controls	Asian-Chinese,Malaysian,Indian	Type 2 Diabetes
21573907	Parra EJ	2011-05-15	Diabetologia	http://www.ncbi.nlm.nih.gov/pubmed/21573907	Genome-wide association study of type 2 diabetes in a sample from Mexico City and a meta-analysis of a Mexican-American sample from Starr County, Texas.	967 Mexican cases, 343 Mexican controls, 837 Mexican-American cases, 437 Mexican-American controls	Hispanic	Type 2 Diabetes
